# Supplementary material
Source: PubMed Central journal article supplement (PMC6694402)
Supplement: jamasurg-154-1005-s001.pdf [file jamasurg-154-1005-s001.pdf]

## Supplementary Online Content

Sheetz KH, Chhabra KR, Smith ME, Dimick JB, Nathan H. Association of discretionary hospital volume standards for high-risk cancer surgery with patient outcomes and access, 2005-2016. *JAMA Surg*. Published online August 14, 2019. doi:10.1001/jamasurg.2019.3017

**eFigure 1.** Overall Risk-Adjusted Outcome Rates by Procedure for all Patients in the Study Cohort.

**eFigure 2.** Risk-Adjusted Complication Rates by Procedure for Hospitals Meeting and Not Meeting the Volume Standards.

**eFigure 3.** Regional Availability of Any Hospital Meeting the Leapfrog Volume Standards.

**eTable.** Risk-Adjusted Outcomes for the Lowest and Highest Volume Hospitals, 2013-2016.

This supplementary material has been provided by the authors to give readers additional information about their work.

**eFigure 1. Overall risk-adjusted outcome rates by procedure for all patients in the study cohort.**

**A. Pancreatic Resection**

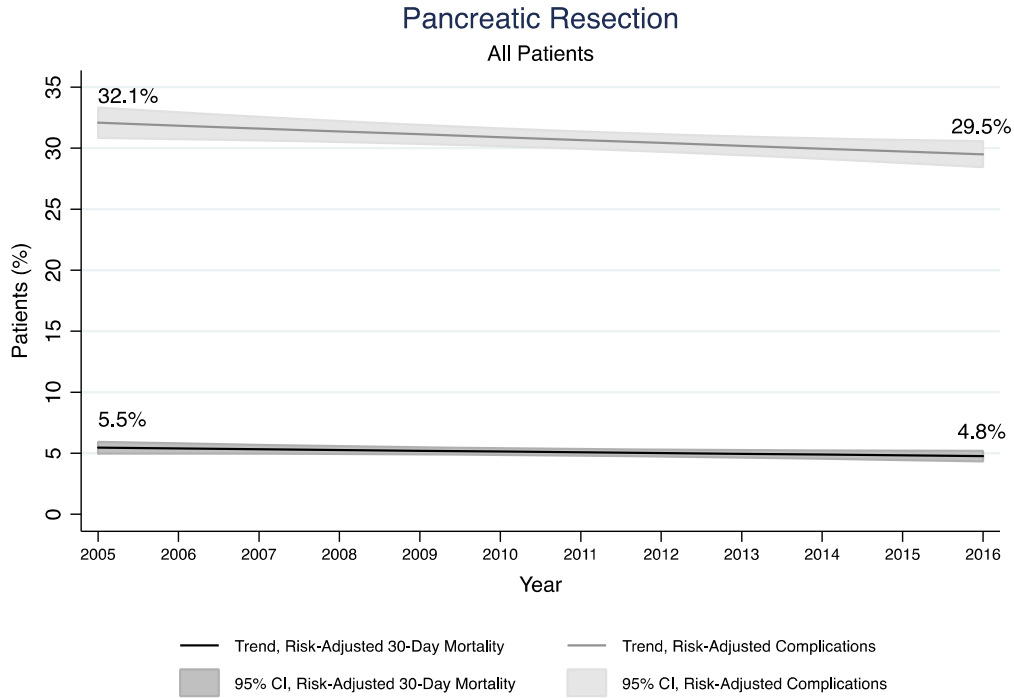

## B. Esophageal Resection

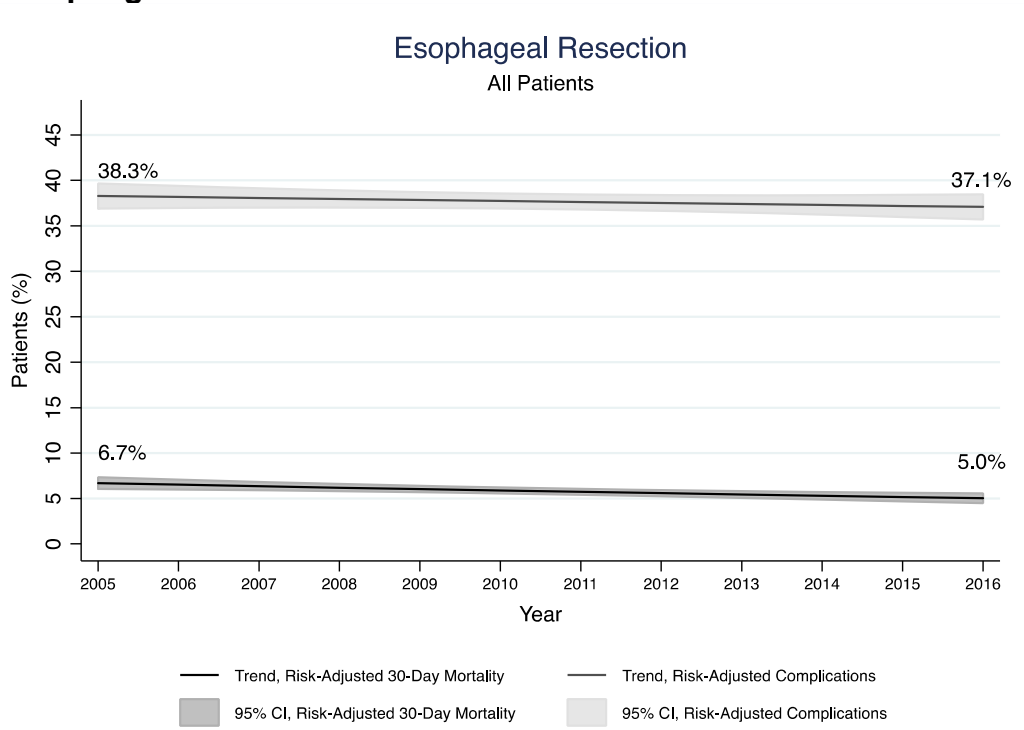

### C. Rectal Resection

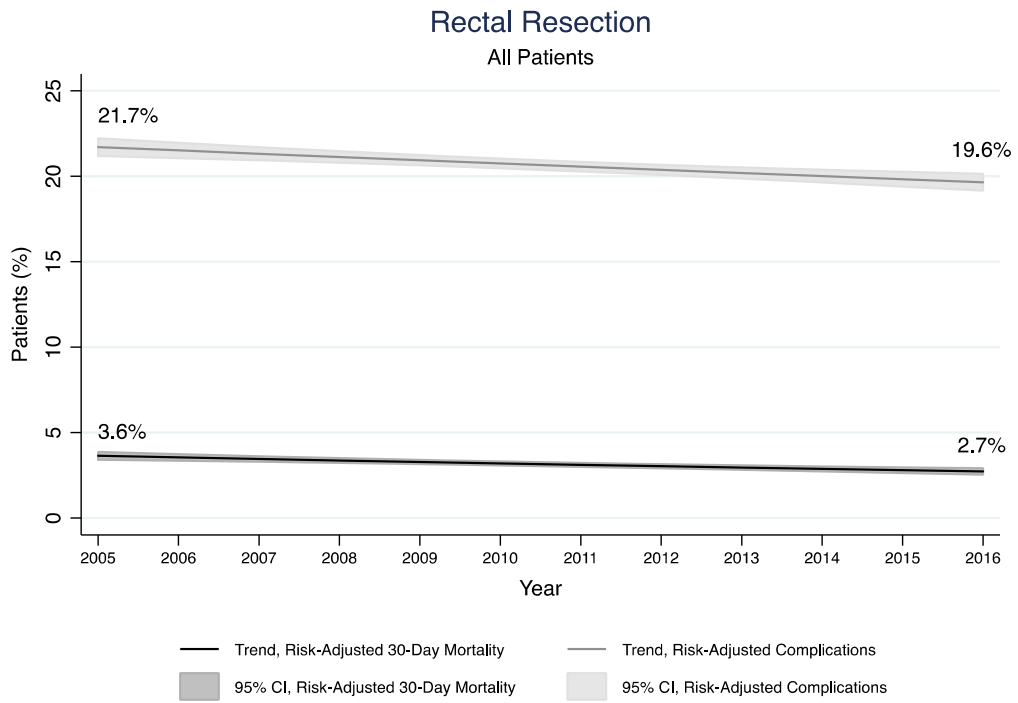

## D. Lung Resection

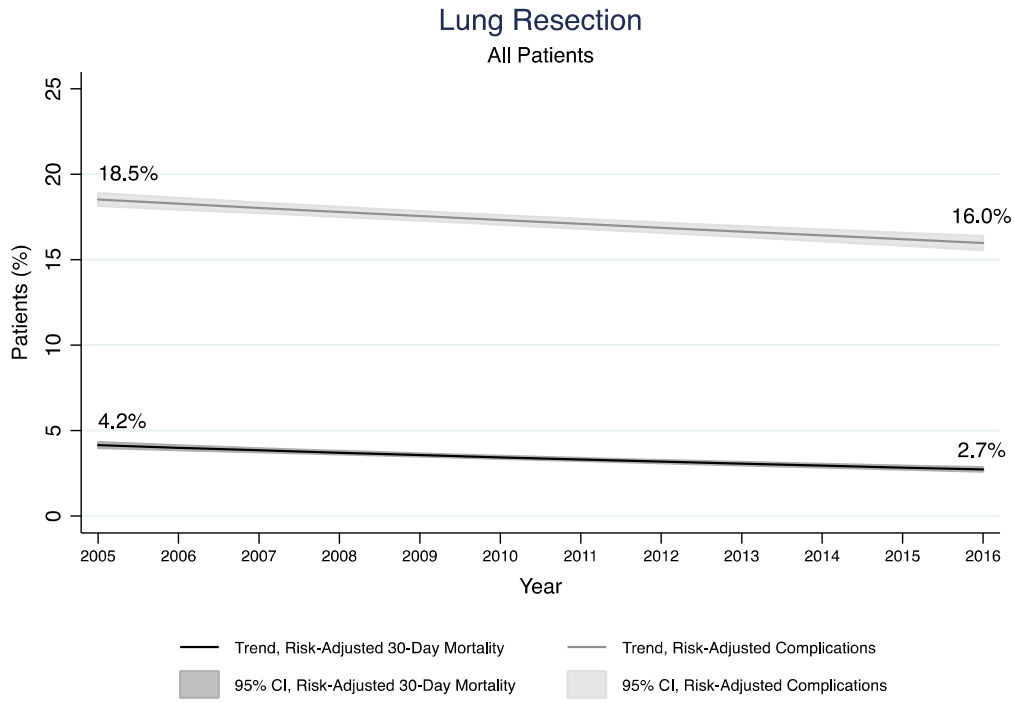

**eFigure 2. Risk-adjusted complication rates by procedure for hospitals meeting and not meeting the volume standards.**

**A. Pancreatic Resection**

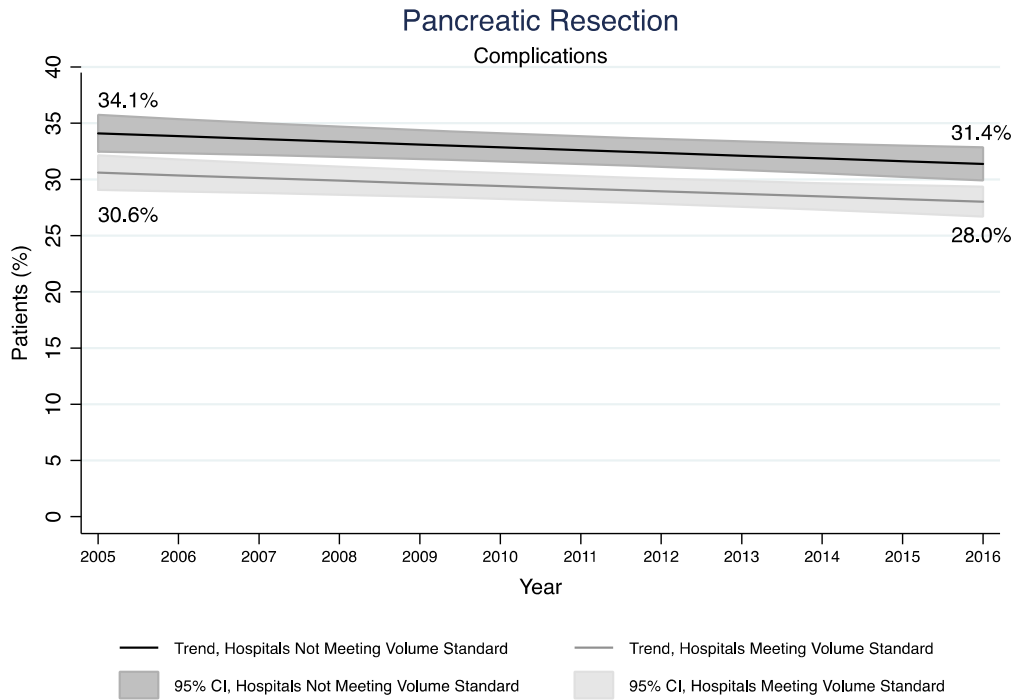

## B. Esophageal Resection

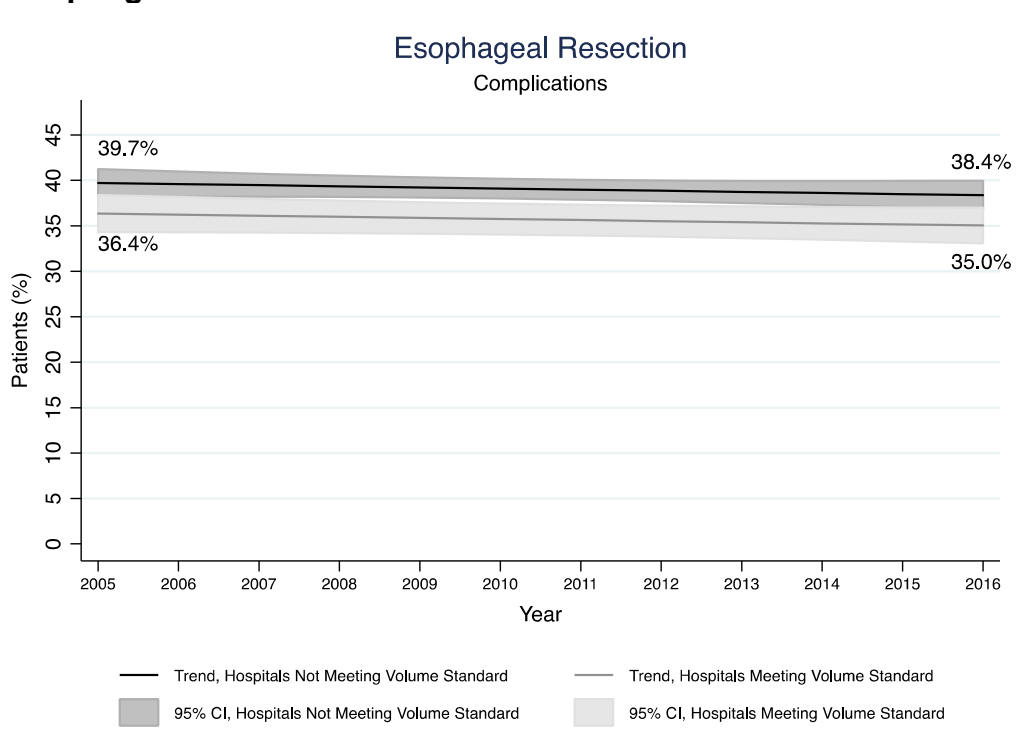

### C. Rectal Resection

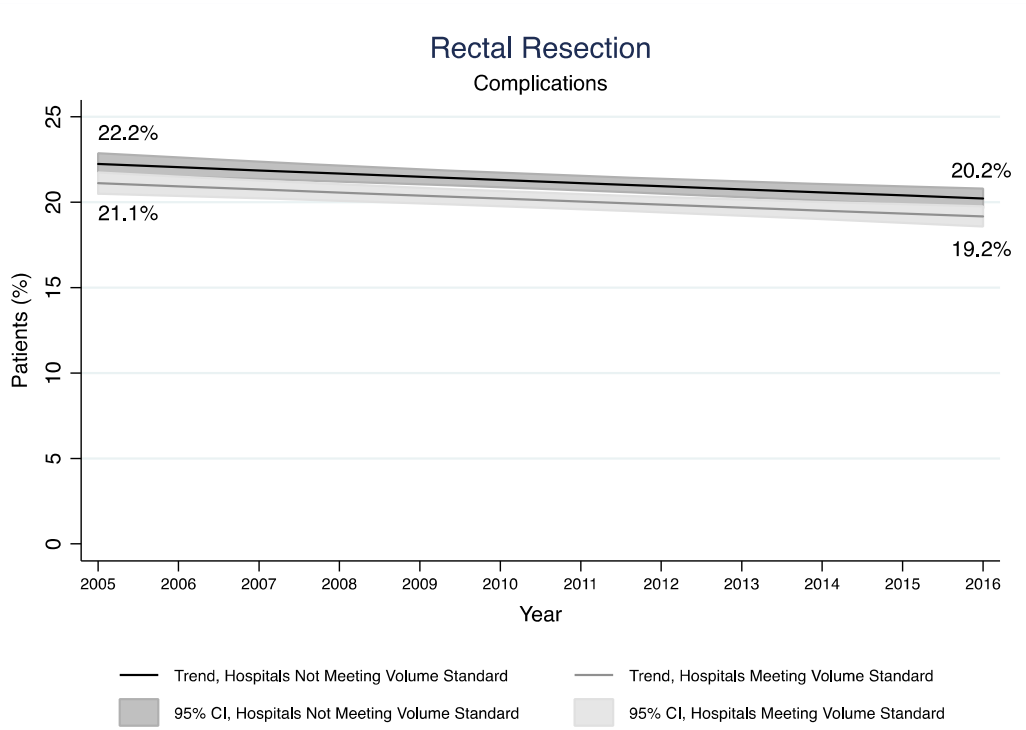



## D. Lung Resection

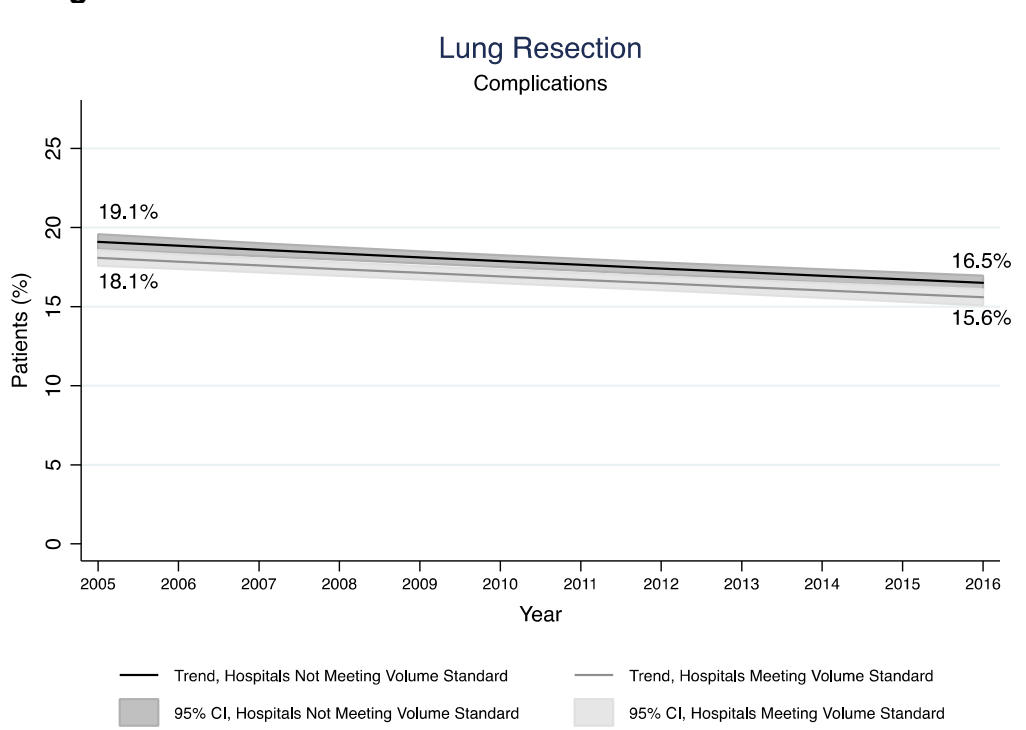

**eFigure 3. Regional availability of any hospital meeting the Leapfrog volume standards.**

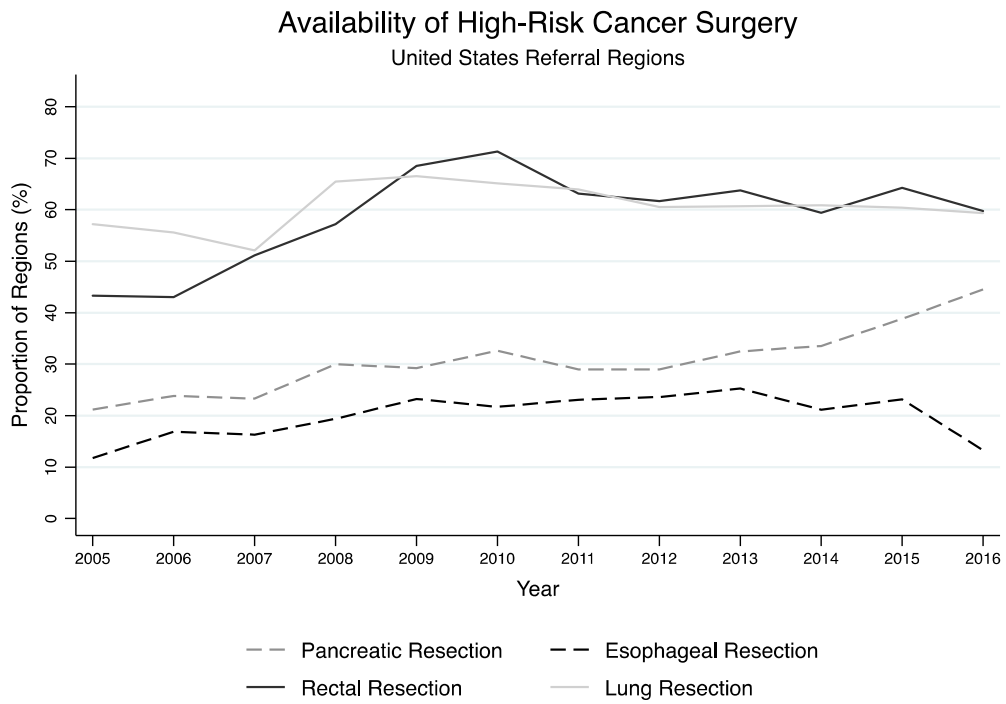

**eTable. Risk-adjusted outcomes for the lowest and highest volume hospitals, 2013-2016.**

| Procedure                   | Lowest Volume Hospitals | Highest Volume Hospitals | Absolute Difference | Adjusted Odds Ratio <sup>1</sup> |
|-----------------------------|-------------------------|--------------------------|---------------------|----------------------------------|
| <b>Pancreatic resection</b> |                         |                          |                     |                                  |
| Complications (%)           | 35.9                    | 29.1                     | -6.8                | 0.69                             |
| 95% CI                      | (34.0, 37.8)            | (26.1, 32.0)             | (-10.6, -3.1)       | (0.55, 0.85)                     |
| <b>Esophageal resection</b> |                         |                          |                     |                                  |
| Complications (%)           | 41.2                    | 37.5                     | -3.7                | 0.83                             |
| 95% CI                      | (38.7, 43.7)            | (33.8, 41.1)             | (-8.8, 1.3)         | (0.64, 1.07)                     |
| <b>Rectal resection</b>     |                         |                          |                     |                                  |
| Complications (%)           | 22.6                    | 19.8                     | -2.8                | 0.81                             |
| 95% CI                      | (21.5, 23.6)            | (18.6, 21.0)             | (-4.5, -1.0)        | (0.71, 0.92)                     |
| <b>Lung resection</b>       |                         |                          |                     |                                  |
| Complications (%)           | 18.7                    | 15.6                     | -3.1                | 0.76                             |
| 95% CI                      | (17.9, 19.5)            | (14.1, 17.0)             | (-5.1, -1.2)        | (0.63, 0.91)                     |

Notes: <sup>1</sup>Lowest volume hospitals are baseline. Lowest volume hospitals reflect the quintile (20%) with the lowest annual volume. Highest volume hospitals reflect the quintile (20%) with the highest annual volume.
